# Supplementary material for: The influence of fish farm activity on the social structure of the common bottlenose dolphin in Sardinia (Italy)
Source: PeerJ. 2021 Mar 4;9:e10960. doi: 10.7717/peerj.10960 (PMC7937346; doi:10.7717/peerj.10960)
Supplement: Supplemental Information 1 — Dataset of the sightings related to the entire study period (2008-2019). [file peerj-09-10960-s001.xlsx]

## Sheet: DATABASE60ph - Copia
PERIODO	YEAR	DATA	FISH FARM	Group size	CALF	%photoid	Group
1	2008	80315	NO	4	0	1	Tt25 Tt50 Tt49 Tt78
1	2008	80911	SI	8	0	0.63	AA1 AA2 AA3 Tt10 Tt50
1	2008	80917	SI	2	0	1	AA1 AA4
1	2008	80921	SI	2	0	1	AA1 AA4
1	2008	81025	SI	2	0	1	AA2 Tt10
1	2008	81109	SI	3	0	0.67	Tt10 Tt26
1	2008	81111	SI	5	0	0.8	AA1 AA3 AA4 Tt26
1	2008	81117	SI	5	0	1	AA1 AA2 AA3 Tt49 Tt50
1	2008	81118	SI	6	0	0.67	AA1 AA3 AA4 Tt10
1	2008	81119	SI	5	0	1	AA1 AA3 AA4 Tt10 Tt50
1	2008	81120	SI	6	0	0.83	AA1 AA3 AA4 Tt10 Tt50
1	2008	81126	SI	7	1	0.71	AA1 AA4 Tt10 Tt50 Tt80
1	2008	81208	SI	9	1	0.78	AA1 Tt10 Tt11 Tt25 Tt42 Tt50 Tt78
1	2008	81220	SI	6	0	1	AA1 AA2 AA4 Tt10 Tt50 Tt52
1	2008	81222	SI	7	0	0.86	AA1 AA4 Tt10 Tt25 Tt50 Tt78
1	2008	81223	SI	7	0	0.86	AA1 AA4 Tt10 Tt25 Tt50 Tt78
1	2008	81224	SI	2	0	1	AA1 AA4
1	2009	90109	SI	1	0	1	Tt10
1	2009	90111	SI	4	0	0.75	AA1 AA2 AA4
1	2009	90116	SI	1	0	1	Tt26
1	2009	90117	SI	2	0	1	Tt25 Tt78
1	2009	90130	SI	4	1	1	AA1 AA4 AA5 Tt26
1	2009	90215	SI	2	0	1	Tt10 Tt26
1	2009	90216	SI	4	0	0.75	AA1 AA4 Tt50
1	2009	90220	SI	2	0	1	Tt10 Tt26
1	2009	90226	SI	1	0	1	Tt26
1	2009	90315	SI	1	0	1	Tt26
1	2009	90318	SI	1	0	1	Tt26
1	2009	90510	NO	5	1	0.8	AA6 Tt06 Tt10 Tt80
1	2009	90523	NO	3	0	1	AA6 Tt10 Tt99
1	2009	90721	NO	11	0	0.64	AA7 AA8 AA12 Tt10 Tt15 Tt35 Tt67
1	2009	90802	NO	9	0	0.67	AA4 AA9 Tt15 Tt16 Tt35 Tt67
1	2009	91028	NO	10	1	1	AA10 Tt10 Tt11 Tt17 Tt24 Tt25 Tt49 Tt52 Tt78
1	2010	100307	SI	5	1	0.6	Tt11 Tt18
1	2010	100325	NO	1	0	1	Tt50
1	2010	100418	NO	13	1	0.62	AA7 AA10 Tt17 Tt18 Tt48 Tt56 Tt80
1	2010	100522	NO	7	0	0.71	AA6 Tt06 Tt10 Tt18 Tt80
1	2010	100607	NO	5	1	0.6	Tt33 Tt35
1	2010	100627	NO	4	0	1	AA6 AA7 AA10 Tt80
1	2010	100801	NO	11	1	0.82	Tt17 Tt18 Tt25 Tt42 Tt48 Tt52 Tt70 Tt78
1	2010	100802	NO	4	0	0.75	AA4 Tt44 Tt80
1	2010	100809	NO	5	0	1	Tt84 Tt05 Tt13 Tt16 Tt25
1	2010	100819	NO	12	2	0.75	Tt10 Tt17 Tt18 Tt25 Tt42 Tt49 Tt78
1	2010	100823	NO	6	1	0.67	Tt03 Tt42 Tt70 Tt80
1	2010	100918	SI	2	0	1	Tt10 Tt80
1	2010	101008	SI	5	0	0.8	AA4 Tt10 Tt50 Tt80
1	2010	101028	SI	8	0	0.88	AA4 Tt03 Tt10 Tt44 Tt50 Tt78 Tt99
1	2010	101030	SI	1	0	1	Tt26
1	2010	101104	SI	4	0	1	AA4 AA10 Tt10 Tt44
1	2010	101106	SI	2	0	1	Tt44 Tt80
1	2010	101214	SI	2	0	1	Tt26 Tt56
1	2010	101229	SI	1	0	1	Tt26
1	2010	101230	SI	1	0	1	Tt26
1	2010	101231	NO	13	0	0.85	Tt03 Tt06 Tt09 Tt11 Tt18 Tt25 Tt48 Tt50 Tt52 Tt56 Tt70
1	2011	110119	SI	1	0	1	Tt26
1	2011	110206	NO	8	1	1	Tt01 Tt18 Tt20 Tt21 Tt24 Tt26 Tt42
1	2011	110311	SI	1	0	1	Tt26
1	2012	120805	NO	3	1	1	Tt01 Tt03
1	2012	120821	NO	2	0	1	Tt04 Tt10
1	2012	120830	NO	4	0	1	Tt03 Tt04 Tt06 Tt08
1	2012	120908	NO	10	0	1	Tt03 Tt04 Tt05 Tt10 Tt11 Tt12 Tt13 Tt14 Tt15 Tt16
1	2012	120909	NO	6	3	1	Tt17 Tt18 Tt19
1	2012	120919	NO	2	1	1	Tt20
1	2012	120921	NO	6	2	1	Tt03 Tt17 Tt18 Tt20
1	2012	120923	NO	2	0	1	Tt21 Tt22
1	2012	121025	NO	7	2	1	Tt03 Tt04 Tt23 Tt24 Tt25
1	2012	121109	NO	1	0	1	Tt26
1	2012	121116	NO	1	0	1	Tt26
1	2013	130228	NO	1	0	1	Tt26
1	2013	130430	NO	5	1	0.8	Tt01 Tt24 Tt38
1	2013	130503	NO	1	0	1	Tt26
1	2013	130514	NO	7	3	1	Tt04 Tt10 Tt27 Tt28
1	2013	130614	NO	6	2	0.83	Tt25 Tt31 Tt42
1	2013	130617	NO	3	1	0.67	Tt18
1	2013	130713	NO	2	1	1	Tt30
1	2013	130723	NO	1	0	1	Tt16
1	2013	130725	NO	3	1	0.67	Tt01
1	2013	130726	NO	13	2	0.77	Tt05 Tt10 Tt11 Tt16 Tt29 Tt33 Tt45 Tt47
1	2013	130726	NO	5	0	0.8	Tt12 Tt31 Tt35 Tt37
1	2013	130813	NO	2	0	1	Tt12 Tt40
1	2013	130816	NO	4	1	1	Tt25 Tt41 Tt42
1	2013	130817	NO	9	3	1	Tt16 Tt27 Tt33 Tt43 Tt45 Tt47
1	2013	130819	NO	2	0	1	Tt33 Tt47
1	2013	130822	NO	1	0	1	Tt46
1	2013	130823	NO	2	1	1	Tt19
1	2013	130827	NO	10	2	1	Tt05 Tt11 Tt15 Tt16 Tt27 Tt30 Tt45 Tt68
1	2013	130908	NO	11	2	1	Tt01 Tt10 Tt19 Tt22 Tt38 Tt50 Tt51 Tt52 Tt53
1	2013	130910	NO	4	2	1	Tt25 Tt41
1	2013	130915	NO	4	1	0.75	Tt51 Tt53
1	2013	130922	NO	2	1	1	Tt01
1	2013	130926	NO	4	2	1	Tt10 Tt41
1	2013	131003	NO	9	2	1	Tt06 Tt12 Tt16 Tt33 Tt45 Tt47 Tt68
1	2013	131027	SI	4	0	1	Tt10 Tt25 Tt42 Tt78
1	2013	131213	SI	2	1	1	Tt56 Tt57
1	2014	140321	NO	8	0	1	Tt18 Tt21 Tt31 Tt46 Tt50 Tt51 Tt53 Tt55
1	2014	140331	SI	3	1	0.67	Tt56 Tt57
1	2014	140507	NO	8	0	0.63	Tt18 Tt21 Tt51 Tt53 Tt55
1	2014	140507	NO	6	0	0.67	Tt09 Tt33 Tt42 Tt47
1	2014	140509	NO	1	0	1	Tt43
1	2014	140526	NO	6	0	1	Tt05 Tt11 Tt12 Tt16 Tt58 Tt68
1	2014	140610	NO	4	0	1	Tt12 Tt16 Tt45 Tt59
1	2014	140612	NO	2	1	1	Tt56 Tt57
1	2014	140620	SI	4	1	0.75	Tt37 Tt40
1	2014	140620	NO	4	0	0.75	Tt24 Tt42 Tt68
1	2014	140621	NO	5	1	1	Tt09 Tt24 Tt42 Tt85
1	2014	140622	NO	5	0	0.8	Tt24 Tt30 Tt33 Tt68
1	2014	140624	NO	4	0	0.75	Tt35 Tt37 Tt40
1	2014	140628	SI	2	1	1	Tt56 Tt57
1	2014	140628	NO	3	0	1	Tt33 Tt47 Tt73
1	2014	140716	NO	1	0	1	Tt61
1	2014	140719	SI	3	0	0.67	Tt41 Tt72
1	2014	140724	NO	5	1	0.6	Tt25 Tt79
1	2014	140804	SI	2	1	1	Tt56 Tt57
1	2014	140805	NO	5	2	0.8	Tt10 Tt42 Tt56 Tt57
1	2014	140813	NO	5	2	0.8	Tt10 Tt68
1	2014	140817	NO	3	1	1	Tt25 Tt42
1	2014	140822	NO	3	1	1	Tt33 Tt47
1	2014	140825	SI	2	0	1	Tt04 Tt10
1	2014	140828	NO	10	1	1	Tt06 Tt12 Tt15 Tt16 Tt30 Tt33 Tt38 Tt47 Tt63
1	2014	140904	NO	5	0	1	Tt04 Tt10 Tt25 Tt42 Tt78
1	2014	140907	NO	2	0	1	Tt22 Tt62
1	2014	140908	NO	1	0	1	Tt73
1	2014	141002	SI	1	0	1	Tt17
1	2014	141019	NO	3	0	1	Tt17 Tt19 Tt22
1	2014	141019	NO	4	1	1	Tt01 Tt52 Tt53
1	2014	141101	NO	5	1	1	Tt32 Tt49 Tt58 Tt73
2	2015	150413	NO	9	0	1	Tt05 Tt06 Tt11 Tt16 Tt30 Tt33 Tt37 Tt47 Tt63
2	2015	150415	NO	17	1	0.88	Tt01 Tt09 Tt11 Tt17 Tt18 Tt19 Tt20 Tt21 Tt22 Tt25 Tt31 Tt42 Tt53 Tt55
2	2015	150424	NO	10	1	0.9	Tt02 Tt22 Tt25 Tt39 Tt41 Tt49 Tt60 Tt61
2	2015	150512	NO	6	0	1	Tt07 Tt11 Tt24 Tt25 Tt46 Tt49
2	2015	150518	NO	5	0	0.8	Tt02 Tt09 Tt49 Tt50
2	2015	150601	NO	10	0	0.7	Tt08 Tt33 Tt37 Tt45 Tt47 Tt48 Tt63
2	2015	150602	NO	5	0	1	Tt01 Tt17 Tt19 Tt53 Tt55
2	2015	150603	NO	6	1	1	Tt01 Tt17 Tt18 Tt19 Tt20
2	2015	150605	NO	2	1	1	Tt79
2	2015	150610	NO	7	0	1	Tt03 Tt05 Tt08 Tt11 Tt45 Tt66 Tt90
2	2015	150611	NO	7	0	1	Tt32 Tt37 Tt45 Tt50 Tt55 Tt64 Tt65
2	2015	150616	NO	7	0	1	Tt03 Tt08 Tt30 Tt40 Tt63 Tt66 Tt67
2	2015	150622	NO	5	0	1	Tt03 Tt16 Tt30 Tt37 Tt67
2	2015	150629	NO	10	1	0.9	Tt05 Tt10 Tt12 Tt35 Tt37 Tt45 Tt50 Tt69
2	2015	150629	NO	14	2	0.93	Tt03 Tt08 Tt11 Tt70 Tt71 Tt90
2	2015	150630	NO	11	2	1	Tt07 Tt17 Tt19 Tt21 Tt25 Tt31 Tt42 Tt46 Tt49
2	2015	150703	NO	13	4	0.92	Tt08 Tt16 Tt20 Tt34 Tt35 Tt37 Tt45 Tt63 Tt72 Tt77
2	2015	150704	NO	4	0	0.75	Tt46 Tt71 Tt73
2	2015	150705	NO	1	0	1	Tt73
2	2015	150706	NO	2	0	1	Tt18 Tt61
2	2015	150707	NO	5	1	1	Tt45 Tt63 Tt66 Tt70
2	2015	150708	NO	9	1	1	Tt03 Tt08 Tt24 Tt33 Tt46 Tt47 Tt73 Tt91
2	2015	150711	NO	2	1	1	Tt24
2	2015	150716	NO	7	1	1	Tt24 Tt33 Tt47 Tt70 Tt72 Tt73
2	2015	150717	NO	9	1	0.89	Tt12 Tt32 Tt45 Tt66 Tt75 Tt76 Tt77
2	2015	150720	NO	1	0	1	Tt78
2	2015	150721	NO	3	1	1	Tt48 Tt49
2	2015	150721	NO	3	0	1	Tt02 Tt61 Tt78
2	2015	150722	NO	2	0	1	Tt03 Tt70
2	2015	150730	NO	2	1	1	Tt25
2	2015	150731	NO	4	0	1	Tt05 Tt11 Tt16 Tt30
2	2015	150808	NO	2	0	1	Tt02 Tt97
2	2015	150813	NO	1	0	1	Tt81
2	2015	150814	NO	1	0	1	Tt81
2	2015	150826	NO	3	1	1	Tt25 Tt42
2	2015	150829	NO	3	1	1	Tt01 Tt22
2	2015	150831	NO	3	0	0.67	Tt09 Tt24
2	2015	150901	NO	3	0	1	Tt02 Tt78 Tt81
2	2015	150903	NO	1	0	1	Tt21
2	2015	150911	NO	13	1	1	Tt07 Tt18 Tt19 Tt20 Tt21 Tt22 Tt24 Tt31 Tt52 Tt60 Tt61 Tt82
2	2015	150912	NO	2	0	1	Tt09 Tt97
2	2015	151017	NO	6	0	0.83	Tt02 Tt09 Tt20 Tt61 Tt78
2	2015	151025	NO	1	0	1	Tt72
2	2015	151025	NO	4	0	1	Tt02 Tt80 Tt81 Tt91
2	2015	151112	NO	7	0	1	Tt51 Tt68 Tt72 Tt73 Tt78 Tt81 Tt91
2	2015	151117	NO	10	0	1	Tt02 Tt18 Tt20 Tt22 Tt51 Tt52 Tt61 Tt68 Tt72 Tt82
2	2016	160127	NO	11	2	1	Tt01 Tt02 Tt06 Tt07 Tt17 Tt18 Tt22 Tt52 Tt82
2	2016	160412	NO	1	0	1	Tt78
2	2016	160415	NO	7	0	1	Tt07 Tt18 Tt31 Tt49 Tt61 Tt78 Tt81
2	2016	160522	NO	7	1	0.86	Tt17 Tt20 Tt22 Tt70 Tt72
2	2016	160522	NO	5	0	1	Tt09 Tt18 Tt50 Tt55 Tt61
2	2016	160525	NO	10	1	1	Tt02 Tt18 Tt44 Tt51 Tt55 Tt61 Tt68 Tt81 Tt82
2	2016	160526	NO	5	0	0.8	Tt07 Tt19 Tt51 Tt81
2	2016	160527	NO	15	1	1	Tt01 Tt06 Tt07 Tt17 Tt18 Tt19 Tt20 Tt22 Tt31 Tt42 Tt50 Tt55 Tt72 Tt78
2	2016	160527	NO	8	0	1	Tt08 Tt16 Tt46 Tt65 Tt71
2	2016	160604	NO	3	1	1	Tt22 Tt87
2	2016	160608	NO	1	0	1	Tt81
2	2016	160622	NO	6	1	0.83	Tt09 Tt25 Tt47 Tt68
2	2016	160629	NO	1	0	1	Tt78
2	2016	160701	NO	11	1	0.82	Tt01 Tt07 Tt19 Tt20 Tt22 Tt31 Tt55 Tt72
2	2016	160701	NO	4	0	1	Tt02 Tt68 Tt81 Tt91
2	2016	160704	NO	1	0	1	Tt02
2	2016	160705	NO	4	1	1	Tt22 Tt25 Tt82
2	2016	160710	NO	4	1	0.75	Tt25 Tt82
2	2016	160711	NO	2	0	1	Tt19 Tt22
2	2016	160718	NO	5	0	1	Tt05 Tt16 Tt30 Tt35 Tt76
2	2016	160721	NO	4	1	0.75	Tt28 Tt89
2	2016	160721	NO	6	1	1	Tt47 Tt72 Tt91
2	2016	160722	NO	11	1	0.82	Tt28 Tt32 Tt45 Tt47 Tt75 Tt77 Tt84 Tt89
2	2016	160722	NO	7	3	1	Tt33 Tt63 Tt90 Tt91
2	2016	160725	NO	3	0	1	Tt68 Tt81 Tt82
2	2016	160731	NO	1	0	1	Tt42
2	2016	160803	NO	4	0	1	Tt09 Tt18 Tt61 Tt81
2	2016	160804	NO	7	3	1	Tt63 Tt89 Tt90 Tt91
2	2016	160809	NO	3	0	1	Tt02 Tt09 Tt81
2	2016	160816	NO	1	0	1	Tt08
2	2016	160816	NO	3	0	1	Tt02 Tt61 Tt81
2	2016	160817	NO	4	1	1	Tt63 Tt76 Tt91
2	2016	160820	NO	10	0	0.9	Tt02 Tt08 Tt18 Tt19 Tt22 Tt31 Tt52 Tt60 Tt61
2	2016	160825	NO	13	4	1	Tt30 Tt32 Tt33 Tt45 Tt47 Tt76 Tt89 Tt90 Tt91
2	2016	160826	NO	6	2	1	Tt18 Tt20 Tt52 Tt61
2	2016	160827	NO	10	1	1	Tt18 Tt20 Tt22 Tt31 Tt42 Tt52 Tt61 Tt78 Tt81
2	2016	160829	NO	9	0	0.78	Tt01 Tt18 Tt19 Tt22 Tt31 Tt61 Tt72
2	2016	160831	NO	11	1	1	Tt01 Tt06 Tt19 Tt20 Tt22 Tt52 Tt61 Tt70 Tt78 Tt82
2	2016	160902	NO	3	1	1	Tt33 Tt47
2	2016	160903	NO	3	0	1	Tt08 Tt19 Tt22
2	2016	160908	NO	3	1	1	Tt22 Tt31 Tt52
2	2016	160910	NO	3	0	1	Tt19 Tt22 Tt48
2	2016	160913	NO	1	0	1	Tt68
2	2016	160923	NO	1	0	1	Tt51
2	2016	160923	NO	8	1	1	Tt01 Tt19 Tt25 Tt42 Tt72 Tt81 Tt82
2	2016	160923	NO	4	1	1	Tt10 Tt51 Tt78
2	2016	160924	NO	8	4	1	Tt33 Tt40 Tt63 Tt90
2	2016	160925	NO	3	0	1	Tt25 Tt42 Tt61
2	2016	160926	NO	5	1	1	Tt68 Tt77 Tt83 Tt89
2	2016	160927	NO	3	1	1	Tt68 Tt90
2	2016	160929	NO	2	0	1	Tt61 Tt73
2	2016	160930	NO	5	0	1	Tt32 Tt37 Tt47 Tt73 Tt91
2	2016	160930	NO	1	0	1	Tt78
2	2016	161004	NO	9	1	1	Tt02 Tt18 Tt20 Tt22 Tt31 Tt38 Tt55 Tt61
2	2016	161031	NO	3	0	1	Tt18 Tt61 Tt70
2	2016	161117	NO	5	0	1	Tt09 Tt42 Tt68 Tt78 Tt80
2	2017	170330	NO	2	0	1	Tt19 Tt79
2	2017	170330	NO	7	1	1	Tt02 Tt07 Tt31 Tt50 Tt60 Tt72 Tt92
2	2017	170331	NO	9	0	1	Tt09 Tt19 Tt44 Tt60 Tt72 Tt78 Tt79 Tt82 Tt92
2	2017	170331	NO	2	0	1	Tt46 Tt81
2	2017	170408	NO	10	0	1	Tt01 Tt10 Tt11 Tt18 Tt31 Tt37 Tt72 Tt81 Tt82 Tt92
2	2017	170410	NO	12	1	1	Tt02 Tt07 Tt10 Tt18 Tt50 Tt61 Tt68 Tt72 Tt78 Tt81 Tt82
2	2017	170423	NO	7	0	1	Tt02 Tt07 Tt18 Tt19 Tt55 Tt61 Tt72
2	2017	170424	NO	5	0	1	Tt10 Tt18 Tt55 Tt72 Tt81
2	2017	170516	NO	2	0	1	Tt09 Tt91
2	2017	170526	NO	2	1	1	Tt31
2	2017	170527	NO	3	0	1	Tt50 Tt60 Tt81
2	2017	170528	NO	5	1	1	Tt03 Tt07 Tt31 Tt78
2	2017	170530	NO	5	0	1	Tt02 Tt08 Tt73 Tt91 Tt93
2	2017	170531	NO	4	0	1	Tt09 Tt51 Tt91 Tt93
2	2017	170602	NO	2	0	1	Tt19 Tt20
2	2017	170603	NO	1	0	1	Tt20
2	2017	170603	NO	2	0	1	Tt51 Tt93
2	2017	170604	NO	3	0	1	Tt45 Tt67 Tt71
2	2017	170609	NO	5	0	1	Tt30 Tt45 Tt47 Tt65 Tt66
2	2017	170610	NO	3	0	0.67	Tt31 Tt46
2	2017	170611	NO	7	0	1	Tt07 Tt18 Tt19 Tt20 Tt25 Tt60 Tt61
2	2017	170612	NO	8	0	1	Tt07 Tt19 Tt20 Tt60 Tt68 Tt72 Tt78 Tt92
2	2017	170613	NO	2	0	1	Tt02 Tt81
2	2017	170614	NO	3	1	1	Tt73 Tt89
2	2017	170615	NO	1	0	1	Tt93
2	2017	170620	NO	8	1	0.88	Tt31 Tt46 Tt72 Tt78 Tt93 Tt94
2	2017	170621	NO	2	0	1	Tt02 Tt81
2	2017	170623	NO	4	1	1	Tt02 Tt18 Tt61
2	2017	170624	NO	3	1	1	Tt31 Tt46
2	2017	170626	NO	5	0	1	Tt02 Tt65 Tt78 Tt81 Tt93
2	2017	170704	NO	2	0	1	Tt86 Tt93
2	2017	170705	NO	3	0	1	Tt09 Tt39 Tt81
2	2017	170705	NO	2	0	1	Tt18 Tt70
2	2017	170706	NO	5	0	1	Tt02 Tt72 Tt73 Tt93 Tt95
2	2017	170707	NO	2	0	1	Tt24 Tt36
2	2017	170707	NO	2	0	1	Tt72 Tt78
2	2017	170708	NO	1	0	1	Tt86
2	2017	170708	NO	11	3	1	Tt01 Tt10 Tt18 Tt19 Tt20 Tt25 Tt42 Tt55 Tt104
2	2017	170708	NO	1	0	1	Tt90
2	2017	170712	NO	4	2	1	Tt31 Tt42 Tt104
2	2017	170717	NO	3	1	1	Tt31 Tt78
2	2017	170718	NO	4	1	1	Tt10 Tt42 Tt80 Tt104
2	2017	170723	NO	2	0	1	Tt50 Tt61
2	2017	170729	NO	3	0	1	Tt02 Tt39 Tt81
2	2017	170730	NO	12	2	1	Tt08 Tt09 Tt30 Tt37 Tt39 Tt64 Tt66 Tt89 Tt90 Tt91
2	2017	170731	NO	4	0	0.75	Tt08 Tt30 Tt90
2	2017	170731	NO	2	0	1	Tt86 Tt93
2	2017	170731	NO	1	0	1	Tt78
2	2017	170802	NO	2	0	1	Tt09 Tt61
2	2017	170802	NO	2	0	1	Tt86 Tt93
2	2017	170802	NO	2	0	1	Tt78 Tt81
2	2017	170803	NO	3	0	1	Tt02 Tt82 Tt86
2	2017	170804	NO	4	0	1	Tt17 Tt49
2	2017	170808	NO	2	0	1	Tt86 Tt93
2	2017	170808	NO	4	0	1	Tt09 Tt80 Tt81 Tt91
2	2017	170808	NO	2	1	1	Tt31
2	2017	170813	NO	1	0	1	Tt86
2	2017	170814	NO	6	0	1	Tt24 Tt36 Tt68 Tt86 Tt91 Tt93
2	2017	170815	NO	1	0	1	Tt68
2	2017	170815	NO	4	1	1	Tt42 Tt72 Tt78 Tt104
2	2017	170816	NO	3	1	1	Tt18 Tt38
2	2017	170816	NO	6	0	1	Tt09 Tt68 Tt81 Tt86 Tt91 Tt93
2	2017	170817	NO	2	1	1	Tt42 Tt104
2	2017	170818	NO	4	1	1	Tt44 Tt89 Tt91
2	2017	170819	NO	2	1	1	Tt42 Tt104
2	2017	170822	NO	5	1	0.8	Tt42 Tt78 Tt81 Tt104
2	2017	170823	NO	12	3	1	Tt47 Tt65 Tt71 Tt73 Tt76 Tt89 Tt90 Tt91 Tt98
2	2017	170824	NO	1	0	1	Tt51
2	2017	170825	NO	5	1	1	Tt02 Tt17 Tt61 Tt78
2	2017	170828	NO	5	1	1	Tt07 Tt19 Tt20 Tt44
2	2017	170828	NO	5	1	1	Tt31 Tt51 Tt68 Tt82
2	2017	170829	NO	4	2	1	Tt18 Tt19
2	2017	170830	NO	1	0	1	Tt03
2	2017	170830	NO	4	0	1	Tt09 Tt78 Tt81 Tt82
2	2017	170905	NO	1	0	1	Tt52
2	2017	170915	NO	1	0	1	Tt78
2	2017	170916	NO	1	0	1	Tt02
2	2017	170922	NO	1	0	1	Tt99
2	2017	170923	NO	4	1	1	Tt18 Tt81 Tt99
2	2017	170924	NO	2	0	1	Tt72 Tt81
2	2017	170925	NO	1	0	1	Tt72
2	2017	170927	NO	4	1	1	Tt18 Tt20 Tt38
2	2017	170927	NO	3	0	1	Tt61 Tt72 Tt78
2	2017	170927	NO	2	0	1	Tt68 Tt81
2	2017	170930	NO	1	0	1	Tt03
2	2017	171001	NO	2	0	1	Tt81 Tt93
2	2017	171003	NO	2	0	1	Tt72 Tt81
2	2018	180420	NO	4	0	1	Tt11 Tt19 Tt20 Tt52
2	2018	180420	NO	1	0	1	Tt51
2	2018	180423	NO	9	0	0.78	Tt02 Tt51 Tt52 Tt68 Tt81 Tt93 Tt96
2	2018	180423	NO	2	1	1	Tt42 Tt104
2	2018	180424	NO	5	0	0.8	Tt08 Tt71 Tt78 Tt94
2	2018	180424	NO	4	1	1	Tt18 Tt68 Tt93
2	2018	180424	NO	2	1	1	Tt42 Tt104
2	2018	180428	NO	7	0	1	Tt02 Tt51 Tt54 Tt68 Tt81 Tt93 Tt96
2	2018	180507	NO	5	0	1	Tt02 Tt68 Tt54 Tt82 Tt100
2	2018	180508	NO	14	1	1	Tt02 Tt09 Tt39 Tt42 Tt54 Tt73 Tt78 Tt81 Tt92 Tt96 Tt100 Tt101 Tt102 Tt104
2	2018	180512	NO	11	4	1	Tt01 Tt07 Tt18 Tt20 Tt25 Tt31 Tt38
2	2018	180512	NO	5	2	0.8	Tt51 Tt93
2	2018	180518	NO	16	1	0.88	Tt02 Tt03 Tt10 Tt17 Tt20 Tt38 Tt39 Tt49 Tt60 Tt78 Tt81 Tt100 Tt103
2	2018	180525	NO	2	0	1	Tt19 Tt48
2	2018	180529	NO	3	0	1	Tt78 Tt91 Tt96
2	2018	180601	NO	3	0	1	Tt78 Tt81 Tt96
2	2018	180602	NO	3	0	1	Tt02 Tt68 Tt73
2	2018	180602	NO	1	0	1	Tt51
2	2018	180603	NO	8	0	1	Tt02 Tt61 Tt68 Tt78 Tt82 Tt91 Tt100 Tt103
2	2018	180616	NO	3	0	1	Tt02 Tt51 Tt82
2	2018	180617	NO	5	0	1	Tt09 Tt78 Tt81 Tt94 Tt103
2	2018	180620	NO	2	0	1	Tt02 Tt51
2	2018	180623	NO	3	0	1	Tt78 Tt94 Tt103
2	2018	180624	NO	9	1	0.78	Tt17 Tt25 Tt42 Tt79 Tt81 Tt94 Tt103 Tt104
2	2018	180625	NO	9	2	1	Tt01 Tt07 Tt18 Tt19 Tt25 Tt31 Tt79 Tt104
2	2018	180626	NO	6	0	1	Tt09 Tt39 Tt44 Tt73 Tt78 Tt81
2	2018	180627	NO	3	0	1	Tt60 Tt66 Tt105
2	2018	180629	NO	4	0	1	Tt04 Tt81 Tt82 Tt106
2	2018	180630	NO	8	1	0.88	Tt17 Tt18 Tt44 Tt51 Tt82 Tt107
2	2018	180704	NO	2	0	1	Tt51 Tt82
2	2018	180709	NO	7	0	0.71	Tt50 Tt68 Tt73 Tt81 Tt92
2	2018	180710	NO	2	0	1	Tt66 Tt94
2	2018	180712	NO	5	0	1	Tt02 Tt51 Tt82 Tt105 Tt106
2	2018	180714	NO	5	0	1	Tt02 Tt68 Tt73 Tt82 Tt103
2	2018	180716	NO	1	0	1	Tt25
2	2018	180719	NO	4	0	1	Tt09 Tt61 Tt78 Tt80
2	2018	180721	NO	2	0	1	Tt61 Tt80
2	2018	180721	NO	2	0	1	Tt51 Tt82
2	2018	180724	NO	2	0	1	Tt38 Tt105
2	2018	180724	NO	5	0	1	Tt09 Tt61 Tt78 Tt80 Tt81
2	2018	180725	NO	2	0	1	Tt52 Tt82
2	2018	180727	NO	1	0	1	Tt51
2	2018	180727	NO	4	0	1	Tt58 Tt61 Tt80 Tt81
2	2018	180728	NO	6	1	0.83	Tt17 Tt18 Tt38 Tt52
2	2018	180728	NO	4	0	1	Tt09 Tt61 Tt78 Tt80
2	2018	180803	NO	1	0	1	Tt52
2	2018	180805	NO	1	0	1	Tt02
2	2018	180806	NO	4	0	1	Tt02 Tt78 Tt81 Tt103
2	2018	180807	NO	2	0	1	Tt02 Tt68
2	2018	180807	NO	6	0	1	Tt70 Tt81 Tt96 Tt103
2	2018	180808	NO	2	0	1	Tt68 Tt103
2	2018	180808	NO	2	0	1	Tt38 Tt52
2	2018	180812	NO	2	1	1	Tt18
2	2018	180813	NO	2	0	1	Tt02 Tt106
2	2018	180823	NO	4	1	1	Tt02 Tt18 Tt20 Tt108
2	2018	180829	NO	3	0	1	Tt02 Tt09 Tt61
2	2018	180831	NO	4	0	1	Tt02 Tt09 Tt81 Tt103
2	2018	180903	NO	4	0	1	Tt02 Tt52 Tt78 Tt81
2	2018	180905	NO	4	0	1	Tt19 Tt20 Tt38 Tt62
2	2018	180905	NO	6	2	1	Tt18 Tt31 Tt61 Tt105 Tt108
2	2018	180906	NO	5	2	1	Tt18 Tt31 Tt61 Tt108
2	2018	180907	NO	4	1	1	Tt10 Tt81 Tt96
2	2018	180908	NO	9	1	0.89	Tt09 Tt65 Tt68 Tt73 Tt91 Tt92 Tt103
2	2018	180909	NO	5	0	1	Tt02 Tt81 Tt92 Tt96 Tt103
2	2018	180910	NO	3	0	1	Tt20 Tt36 Tt109
2	2018	180911	NO	1	0	1	Tt81
2	2018	180912	NO	13	0	1	Tt02 Tt08 Tt09 Tt16 Tt32 Tt65 Tt68 Tt73 Tt92 Tt94 Tt96 Tt101 Tt103
2	2018	180915	NO	9	0	1	Tt02 Tt09 Tt32 Tt44 Tt80 Tt81 Tt82 Tt91 Tt101
2	2018	180916	NO	1	0	1	Tt02
2	2018	180920	NO	2	0	1	Tt20 Tt38
2	2018	180927	NO	3	1	0.67	Tt31
2	2018	180929	NO	4	1	1	Tt18 Tt38 Tt61 Tt109
2	2018	181014	NO	8	0	0.75	Tt17 Tt65 Tt68 Tt70 Tt73 Tt92
2	2018	181019	NO	5	0	1	Tt04 Tt74 Tt80 Tt81 Tt93
2	2019	190416	NO	19	2	0.89	Tt01 Tt18 Tt19 Tt20 Tt31 Tt48 Tt50 Tt62 Tt78 Tt79 Tt81 Tt105 Tt108 Tt110 Tt111
2	2019	190502	NO	3	1	1	Tt18 Tt52 Tt108
2	2019	190503	NO	5	0	0.8	Tt02 Tt08 Tt51 Tt65
2	2019	190531	NO	9	0	0.78	Tt01 Tt17 Tt19 Tt20 Tt31 Tt38 Tt111
2	2019	190602	NO	4	0	1	Tt18 Tt61 Tt81 Tt108
2	2019	190604	NO	9	0	0.78	Tt02 Tt63 Tt68 Tt82 Tt92 Tt101 Tt112
2	2019	190605	NO	10	0	1	Tt02 Tt04 Tt09 Tt68 Tt78 Tt81 Tt82 Tt86 Tt97 Tt103
2	2019	190608	NO	5	0	1	Tt02 Tt39 Tt68 Tt80 Tt113
2	2019	190613	NO	8	0	1	Tt18 Tt24 Tt38 Tt39 Tt48 Tt52 Tt62 Tt108
2	2019	190619	NO	7	0	0.86	Tt01 Tt18 Tt39 Tt86 Tt96 Tt108
2	2019	190620	NO	6	0	0.83	Tt17 Tt19 Tt25 Tt39 Tt74
2	2019	190620	NO	7	1	0.86	Tt01 Tt18 Tt20 Tt86 Tt108
2	2019	190621	NO	16	1	0.88	Tt01 Tt02 Tt17 Tt18 Tt19 Tt20 Tt31 Tt56 Tt62 Tt81 Tt82 Tt105 Tt108
2	2019	190623	NO	2	0	1	Tt32 Tt78
2	2019	190624	NO	17	1	0.82	Tt01 Tt18 Tt19 Tt20 Tt25 Tt38 Tt42 Tt48 Tt49 Tt52 Tt62 Tt103 Tt108
2	2019	190626	NO	14	1	1	Tt08 Tt17 Tt18 Tt19 Tt20 Tt52 Tt62 Tt80 Tt81 Tt86 Tt103 Tt108 Tt111
2	2019	190627	NO	8	1	0.88	Tt02 Tt17 Tt19 Tt20 Tt62 Tt111
2	2019	190627	NO	1	0	1	Tt74
2	2019	190628	NO	22	3	0.95	Tt02 Tt03 Tt04 Tt17 Tt18 Tt19 Tt20 Tt52 Tt61 Tt62 Tt74 Tt78 Tt81 Tt82 Tt96 Tt97 Tt108 Tt111
2	2019	190630	NO	10	0	0.9	Tt11 Tt12 Tt16 Tt30 Tt32 Tt63 Tt64 Tt75 Tt83
2	2019	190701	NO	9	2	1	Tt11 Tt17 Tt19 Tt20 Tt52 Tt60 Tt62
2	2019	190702	NO	7	2	1	Tt17 Tt19 Tt20 Tt52 Tt62
2	2019	190703	NO	5	0	0.6	Tt18 Tt49 Tt108
2	2019	190704	NO	10	3	1	Tt18 Tt20 Tt49 Tt62 Tt80 Tt105 Tt108
2	2019	190705	NO	9	2	1	Tt18 Tt19 Tt20 Tt62 Tt80 Tt105 Tt108
2	2019	190706	NO	3	0	1	Tt18 Tt61 Tt108
2	2019	190717	NO	7	2	1	Tt17 Tt19 Tt20 Tt38 Tt111
2	2019	190718	NO	6	2	1	Tt17 Tt20 Tt38 Tt52
2	2019	190718	NO	9	0	0.78	Tt63 Tt68 Tt70 Tt83 Tt94 Tt98 Tt101
2	2019	190719	NO	1	0	1	Tt55
2	2019	190720	NO	3	0	0.67	Tt101 Tt114
2	2019	190720	NO	2	1	1	Tt81
2	2019	190721	NO	15	0	0.8	Tt02 Tt18 Tt38 Tt39 Tt50 Tt51 Tt83 Tt86 Tt96 Tt108 Tt113 Tt115
2	2019	190722	NO	16	3	0.94	Tt01 Tt17 Tt18 Tt19 Tt20 Tt38 Tt52 Tt62 Tt81 Tt96 Tt108 Tt111
2	2019	190723	NO	10	0	0.8	Tt01 Tt18 Tt52 Tt55 Tt62 Tt86 Tt108 Tt115
2	2019	190724	NO	2	0	1	Tt03 Tt116
2	2019	190725	NO	14	3	0.93	Tt01 Tt17 Tt18 Tt19 Tt20 Tt48 Tt52 Tt62 Tt81 Tt108
2	2019	190726	NO	9	3	1	Tt17 Tt19 Tt20 Tt48 Tt86 Tt97
2	2019	190727	NO	7	1	1	Tt10 Tt19 Tt20 Tt38 Tt116 Tt117
2	2019	190730	NO	18	3	0.83	Tt01 Tt09 Tt17 Tt19 Tt50 Tt62 Tt74 Tt78 Tt81 Tt86 Tt97 Tt114
2	2019	190731	NO	12	1	0.75	Tt03 Tt17 Tt39 Tt83 Tt94 Tt103 Tt105 Tt115
2	2019	190801	NO	5	0	1	Tt19 Tt38 Tt62 Tt111 Tt117
2	2019	190801	NO	10	0	0.9	Tt03 Tt13 Tt86 Tt105 Tt115
2	2019	190801	NO	4	0	0.75	Tt91 Tt98
2	2019	190802	NO	8	0	1	Tt02 Tt03 Tt09 Tt61 Tt68 Tt78 Tt92 Tt96
2	2019	190804	NO	7	1	1	Tt03 Tt09 Tt20 Tt38 Tt78 Tt105
2	2019	190805	NO	9	0	1	Tt02 Tt18 Tt19 Tt52 Tt62 Tt96 Tt108 Tt111 Tt117
2	2019	190806	NO	12	0	1	Tt02 Tt03 Tt18 Tt19 Tt50 Tt52 Tt61 Tt62 Tt70 Tt81 Tt105 Tt108
2	2019	190807	NO	4	1	1	Tt03 Tt20 Tt105
2	2019	190807	NO	6	0	0.83	Tt01 Tt18 Tt38 Tt52 Tt108
2	2019	190809	NO	9	0	1	Tt11 Tt12 Tt30 Tt32 Tt47 Tt65 Tt68 Tt91 Tt101
2	2019	190810	NO	4	0	1	Tt02 Tt09 Tt68 Tt96
2	2019	190811	NO	7	1	1	Tt18 Tt19 Tt20 Tt38 Tt52 Tt108
2	2019	190811	NO	2	0	1	Tt92 Tt96
2	2019	190812	NO	4	0	1	Tt60 Tt61 Tt78 Tt105
2	2019	190812	NO	4	1	1	Tt19 Tt20 Tt62
2	2019	190812	NO	9	0	0.78	Tt02 Tt03 Tt44 Tt50 Tt81 Tt94 Tt115
2	2019	190817	NO	15	1	0.93	Tt01 Tt02 Tt18 Tt19 Tt20 Tt31 Tt38 Tt48 Tt62 Tt105 Tt108 Tt111 Tt118
2	2019	190818	NO	12	1	0.92	Tt01 Tt18 Tt20 Tt31 Tt38 Tt48 Tt61 Tt105 Tt108 Tt118
2	2019	190819	NO	6	1	1	Tt18 Tt19 Tt20 Tt62 Tt108
2	2019	190820	NO	9	1	1	Tt09 Tt19 Tt20 Tt38 Tt62 Tt78 Tt99 Tt105
2	2019	190821	NO	11	1	0.91	Tt01 Tt18 Tt19 Tt20 Tt38 Tt62 Tt78 Tt105 Tt108
2	2019	190822	NO	3	0	1	Tt61 Tt78 Tt105
2	2019	190823	NO	2	0	1	Tt02 Tt68
2	2019	190823	NO	7	0	0.86	Tt25 Tt42 Tt78 Tt86 Tt104
2	2019	190824	NO	6	0	0.83	Tt25 Tt42 Tt78 Tt86 Tt104
2	2019	190827	NO	8	0	0.89	Tt09 Tt18 Tt20 Tt25 Tt61 Tt78 Tt82 Tt108
2	2019	190829	NO	19	0	0.89	Tt09 Tt11 Tt12 Tt16 Tt30 Tt32 Tt36 Tt47 Tt64 Tt65 Tt67 Tt68 Tt70 Tt75 Tt76 Tt91 Tt99
2	2019	190831	NO	1	0	1	Tt74
2	2019	190831	NO	5	2	1	Tt17 Tt20 Tt38
2	2019	190831	NO	12	3	1	Tt18 Tt42 Tt62 Tt104 Tt105 Tt108
2	2019	190911	NO	7	0	0.86	Tt08 Tt47 Tt65 Tt68 Tt98 Tt101
2	2019	190912	NO	11	0	0.82	Tt01 Tt18 Tt38 Tt61 Tt62 Tt70 Tt80 Tt103 Tt108
2	2019	190915	NO	11	1	0.91	Tt01 Tt18 Tt19 Tt20 Tt62 Tt74 Tt94 Tt108 Tt111
2	2019	190915	NO	1	0	1	Tt120
2	2019	190915	NO	13	2	0.92	Tt01 Tt17 Tt18 Tt19 Tt20 Tt38 Tt48 Tt62 Tt108 Tt111
2	2019	190917	NO	2	0	1	Tt02 Tt96
2	2019	190921	NO	19	2	0.95	Tt01 Tt10 Tt17 Tt18 Tt19 Tt20 Tt38 Tt50 Tt60 Tt62 Tt70 Tt78 Tt81 Tt103 Tt105 Tt108
2	2019	190928	NO	6	0	1	Tt09 Tt34 Tt54 Tt78 Tt82 Tt103
2	2019	190929	NO	12	2	0.83	Tt01 Tt17 Tt18 Tt19 Tt20 Tt38 Tt62 Tt108
2	2019	190929	NO	3	0	1	Tt09 Tt61 Tt81
2	2019	190930	NO	13	0	1	Tt09 Tt10 Tt18 Tt34 Tt38 Tt61 Tt62 Tt74 Tt78 Tt81 Tt103 Tt105 Tt108
2	2019	191009	NO	19	0	0.95	AA12 Tt01 Tt02 Tt18 Tt19 Tt31 Tt42 Tt60 Tt61 Tt62 Tt70 Tt94 Tt96 Tt104 Tt105 Tt108 Tt116 Tt118
2	2019	191012	NO	15	1	0.93	Tt01 Tt09 Tt20 Tt31 Tt38 Tt42 Tt78 Tt81 Tt94 Tt103 Tt104 Tt118 Tt119
2	2019	191018	NO	21	1	0.95	Tt01 Tt02 Tt09 Tt18 Tt19 Tt20 Tt39 Tt48 Tt50 Tt51 Tt61 Tt62 Tt70 Tt78 Tt81 Tt82 Tt96 Tt105 Tt108
