# Supplementary material for: The influence of fish farm activity on the social structure of the common bottlenose dolphin in Sardinia (Italy)
Source: PeerJ. 2021 Mar 4;9:e10960. doi: 10.7717/peerj.10960 (PMC7937346; doi:10.7717/peerj.10960)
Supplement: Supplemental Information 2 — Dataset of sighitings related to the P1 (period 1). [file peerj-09-10960-s002.xlsx]

## Sheet: DATABASE60ph_per1
PERIODO	YEAR	DATA	FISH FARM	Group size	CALF	%photoid	Group
1	2008	80315	NO	4	0	1	Tt25 Tt50 Tt49 Tt78
1	2008	80911	SI	8	0	0.63	AA1 AA2 AA3 Tt10 Tt50
1	2008	80917	SI	2	0	1	AA1 AA4
1	2008	80921	SI	2	0	1	AA1 AA4
1	2008	81025	SI	2	0	1	AA2 Tt10
1	2008	81109	SI	3	0	0.67	Tt10 Tt26
1	2008	81111	SI	5	0	0.8	AA1 AA3 AA4 Tt26
1	2008	81117	SI	5	0	1	AA1 AA2 AA3 Tt49 Tt50
1	2008	81118	SI	6	0	0.67	AA1 AA3 AA4 Tt10
1	2008	81119	SI	5	0	1	AA1 AA3 AA4 Tt10 Tt50
1	2008	81120	SI	6	0	0.83	AA1 AA3 AA4 Tt10 Tt50
1	2008	81126	SI	7	1	0.71	AA1 AA4 Tt10 Tt50 Tt80
1	2008	81208	SI	9	1	0.78	AA1 Tt10 Tt11 Tt25 Tt42 Tt50 Tt78
1	2008	81220	SI	6	0	1	AA1 AA2 AA4 Tt10 Tt50 Tt52
1	2008	81222	SI	7	0	0.86	AA1 AA4 Tt10 Tt25 Tt50 Tt78
1	2008	81223	SI	7	0	0.86	AA1 AA4 Tt10 Tt25 Tt50 Tt78
1	2008	81224	SI	2	0	1	AA1 AA4
1	2009	90109	SI	1	0	1	Tt10
1	2009	90111	SI	4	0	0.75	AA1 AA2 AA4
1	2009	90116	SI	1	0	1	Tt26
1	2009	90117	SI	2	0	1	Tt25 Tt78
1	2009	90130	SI	4	1	1	AA1 AA4 AA5 Tt26
1	2009	90215	SI	2	0	1	Tt10 Tt26
1	2009	90216	SI	4	0	0.75	AA1 AA4 Tt50
1	2009	90220	SI	2	0	1	Tt10 Tt26
1	2009	90226	SI	1	0	1	Tt26
1	2009	90315	SI	1	0	1	Tt26
1	2009	90318	SI	1	0	1	Tt26
1	2009	90510	NO	5	1	0.8	AA6 Tt06 Tt10 Tt80
1	2009	90523	NO	3	0	1	AA6 Tt10 Tt99
1	2009	90721	NO	11	0	0.64	AA7 AA8 AA12 Tt10 Tt15 Tt35 Tt67
1	2009	90802	NO	9	0	0.67	AA4 AA9 Tt15 Tt16 Tt35 Tt67
1	2009	91028	NO	10	1	1	AA10 Tt10 Tt11 Tt17 Tt24 Tt25 Tt49 Tt52 Tt78
1	2010	100307	SI	5	1	0.6	Tt11 Tt18
1	2010	100325	NO	1	0	1	Tt50
1	2010	100418	NO	13	1	0.62	AA7 AA10 Tt17 Tt18 Tt48 Tt56 Tt80
1	2010	100522	NO	7	0	0.71	AA6 Tt06 Tt10 Tt18 Tt80
1	2010	100607	NO	5	1	0.6	Tt33 Tt35
1	2010	100627	NO	4	0	1	AA6 AA7 AA10 Tt80
1	2010	100801	NO	11	1	0.82	Tt17 Tt18 Tt25 Tt42 Tt48 Tt52 Tt70 Tt78
1	2010	100802	NO	4	0	0.75	AA4 Tt44 Tt80
1	2010	100809	NO	5	0	1	Tt84 Tt05 Tt13 Tt16 Tt25
1	2010	100819	NO	12	2	0.75	Tt10 Tt17 Tt18 Tt25 Tt42 Tt49 Tt78
1	2010	100823	NO	6	1	0.67	Tt03 Tt42 Tt70 Tt80
1	2010	100918	SI	2	0	1	Tt10 Tt80
1	2010	101008	SI	5	0	0.8	AA4 Tt10 Tt50 Tt80
1	2010	101028	SI	8	0	0.88	AA4 Tt03 Tt10 Tt44 Tt50 Tt78 Tt99
1	2010	101030	SI	1	0	1	Tt26
1	2010	101104	SI	4	0	1	AA4 AA10 Tt10 Tt44
1	2010	101106	SI	2	0	1	Tt44 Tt80
1	2010	101214	SI	2	0	1	Tt26 Tt56
1	2010	101229	SI	1	0	1	Tt26
1	2010	101230	SI	1	0	1	Tt26
1	2010	101231	NO	13	0	0.85	Tt03 Tt06 Tt09 Tt11 Tt18 Tt25 Tt48 Tt50 Tt52 Tt56 Tt70
1	2011	110119	SI	1	0	1	Tt26
1	2011	110206	NO	8	1	1	Tt01 Tt18 Tt20 Tt21 Tt24 Tt26 Tt42
1	2011	110311	SI	1	0	1	Tt26
1	2012	120805	NO	3	1	1	Tt01 Tt03
1	2012	120821	NO	2	0	1	Tt04 Tt10
1	2012	120830	NO	4	0	1	Tt03 Tt04 Tt06 Tt08
1	2012	120908	NO	10	0	1	Tt03 Tt04 Tt05 Tt10 Tt11 Tt12 Tt13 Tt14 Tt15 Tt16
1	2012	120909	NO	6	3	1	Tt17 Tt18 Tt19
1	2012	120919	NO	2	1	1	Tt20
1	2012	120921	NO	6	2	1	Tt03 Tt17 Tt18 Tt20
1	2012	120923	NO	2	0	1	Tt21 Tt22
1	2012	121025	NO	7	2	1	Tt03 Tt04 Tt23 Tt24 Tt25
1	2012	121109	NO	1	0	1	Tt26
1	2012	121116	NO	1	0	1	Tt26
1	2013	130228	NO	1	0	1	Tt26
1	2013	130430	NO	5	1	0.8	Tt01 Tt24 Tt38
1	2013	130503	NO	1	0	1	Tt26
1	2013	130514	NO	7	3	1	Tt04 Tt10 Tt27 Tt28
1	2013	130614	NO	6	2	0.83	Tt25 Tt31 Tt42
1	2013	130617	NO	3	1	0.67	Tt18
1	2013	130713	NO	2	1	1	Tt30
1	2013	130723	NO	1	0	1	Tt16
1	2013	130725	NO	3	1	0.67	Tt01
1	2013	130726	NO	13	2	0.77	Tt05 Tt10 Tt11 Tt16 Tt29 Tt33 Tt45 Tt47
1	2013	130726	NO	5	0	0.8	Tt12 Tt31 Tt35 Tt37
1	2013	130813	NO	2	0	1	Tt12 Tt40
1	2013	130816	NO	4	1	1	Tt25 Tt41 Tt42
1	2013	130817	NO	9	3	1	Tt16 Tt27 Tt33 Tt43 Tt45 Tt47
1	2013	130819	NO	2	0	1	Tt33 Tt47
1	2013	130822	NO	1	0	1	Tt46
1	2013	130823	NO	2	1	1	Tt19
1	2013	130827	NO	10	2	1	Tt05 Tt11 Tt15 Tt16 Tt27 Tt30 Tt45 Tt68
1	2013	130908	NO	11	2	1	Tt01 Tt10 Tt19 Tt22 Tt38 Tt50 Tt51 Tt52 Tt53
1	2013	130910	NO	4	2	1	Tt25 Tt41
1	2013	130915	NO	4	1	0.75	Tt51 Tt53
1	2013	130922	NO	2	1	1	Tt01
1	2013	130926	NO	4	2	1	Tt10 Tt41
1	2013	131003	NO	9	2	1	Tt06 Tt12 Tt16 Tt33 Tt45 Tt47 Tt68
1	2013	131027	SI	4	0	1	Tt10 Tt25 Tt42 Tt78
1	2013	131213	SI	2	1	1	Tt56 Tt57
1	2014	140321	NO	8	0	1	Tt18 Tt21 Tt31 Tt46 Tt50 Tt51 Tt53 Tt55
1	2014	140331	SI	3	1	0.67	Tt56 Tt57
1	2014	140507	NO	8	0	0.63	Tt18 Tt21 Tt51 Tt53 Tt55
1	2014	140507	NO	6	0	0.67	Tt09 Tt33 Tt42 Tt47
1	2014	140509	NO	1	0	1	Tt43
1	2014	140526	NO	6	0	1	Tt05 Tt11 Tt12 Tt16 Tt58 Tt68
1	2014	140610	NO	4	0	1	Tt12 Tt16 Tt45 Tt59
1	2014	140612	NO	2	1	1	Tt56 Tt57
1	2014	140620	SI	4	1	0.75	Tt37 Tt40
1	2014	140620	NO	4	0	0.75	Tt24 Tt42 Tt68
1	2014	140621	NO	5	1	1	Tt09 Tt24 Tt42 Tt85
1	2014	140622	NO	5	0	0.8	Tt24 Tt30 Tt33 Tt68
1	2014	140624	NO	4	0	0.75	Tt35 Tt37 Tt40
1	2014	140628	SI	2	1	1	Tt56 Tt57
1	2014	140628	NO	3	0	1	Tt33 Tt47 Tt73
1	2014	140716	NO	1	0	1	Tt61
1	2014	140719	SI	3	0	0.67	Tt41 Tt72
1	2014	140724	NO	5	1	0.6	Tt25 Tt79
1	2014	140804	SI	2	1	1	Tt56 Tt57
1	2014	140805	NO	5	2	0.8	Tt10 Tt42 Tt56 Tt57
1	2014	140813	NO	5	2	0.8	Tt10 Tt68
1	2014	140817	NO	3	1	1	Tt25 Tt42
1	2014	140822	NO	3	1	1	Tt33 Tt47
1	2014	140825	SI	2	0	1	Tt04 Tt10
1	2014	140828	NO	10	1	1	Tt06 Tt12 Tt15 Tt16 Tt30 Tt33 Tt38 Tt47 Tt63
1	2014	140904	NO	5	0	1	Tt04 Tt10 Tt25 Tt42 Tt78
1	2014	140907	NO	2	0	1	Tt22 Tt62
1	2014	140908	NO	1	0	1	Tt73
1	2014	141002	SI	1	0	1	Tt17
1	2014	141019	NO	3	0	1	Tt17 Tt19 Tt22
1	2014	141019	NO	4	1	1	Tt01 Tt52 Tt53
1	2014	141101	NO	5	1	1	Tt32 Tt49 Tt58 Tt73
